# Supplementary material for: A predictive model of asymmetric morphogenesis from 3D reconstructions of mouse heart looping dynamics
Source: PubMed Central journal article supplement (PMC5705212; doi:10.7554/elife.28951), 2017-11-28
Supplement: elife-28951-fig1-data1.pdf [file elife-28951-fig1-data1.pdf]

VENTRAL VIEW

DORSAL VIEW

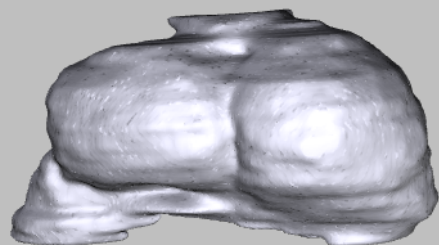

E8.5e

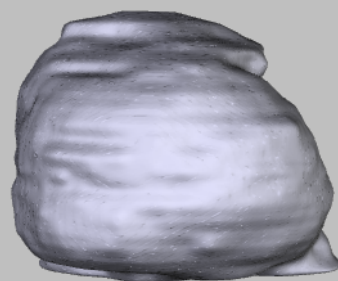

E8.5f

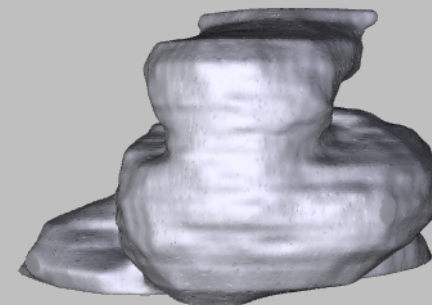

E8.5g

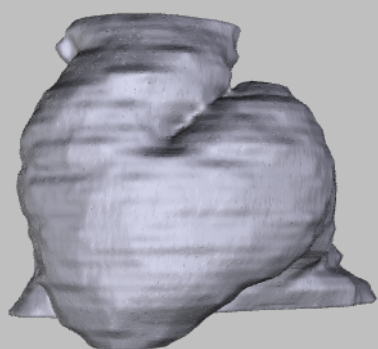

E8.5h

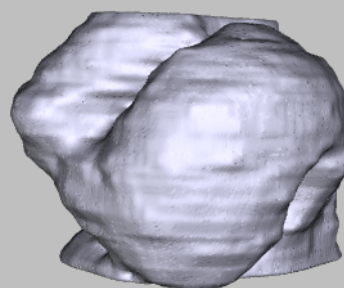

E8.5i

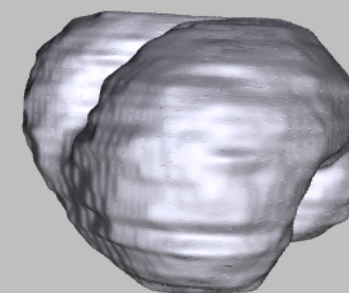

E8.5j
